# Supplementary material for: 3D-Printed Drug Delivery Systems: The Effects of Drug Incorporation Methods on Their Release and Antibacterial Efficiency
Source: MDPI journal article supplement (doi:10.3390/ma13153364), 2020-07-29
Supplement: s1 [file s1]

# 3D-Printed Drug Delivery Systems: The Effects of Drug Incorporation Methods on Their Release and Antibacterial Efficiency

Bahaa Shaqour, Inés Reigada, Żaneta Górecka, Emilia Choinńska, Bart Verleije, Koen Beyers, Wojciech Świąszkowski, Adyary Fallarero and Paul Cos

## Microcomputed topography quantitative measurements

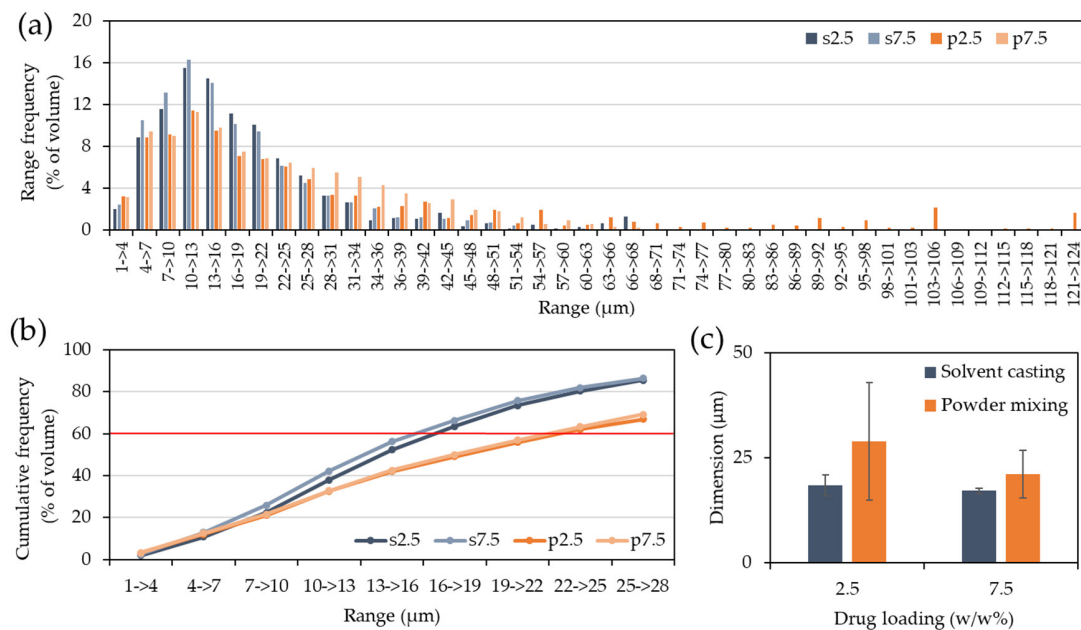

**Figure S1.** (a) Range frequency calculated as a percentage volume in a certain dimensional range, with (b) illustrating the cumulative frequency highlighting when percentage volume reaches around 60% of the total volume and (c) Particles' average dimension at different drug loading percentages.

## Release kinetics models

1. First order kinetics:

$$\log\left(100 - \frac{m_t}{m_\infty} \%\right) = -\frac{K}{2.303}t \quad (S1)$$

where  $m_t$  is the released amount at a certain time point,  $m_\infty$  is the amount of the drug released after an infinitive time,  $K$  is the first-order release rate constant and  $t$  is time [1].

2. Korsmeyer-Peppas model:

$$\log\left(\frac{m_t}{m_\infty} \%\right) = \log k_{K-P} + n \log t \quad (S2)$$

where  $m_t$  is the released amount at a certain time point,  $m_\infty$  is the amount of the drug released after an infinitive time,  $k_{K-P}$  is the Korsmeyer-Peppas constant,  $n$  is the parameter indicative of the drug release mechanism and  $t$  is time [1]. The release model is fitted up to 60% of the release data.

### 3. Higuchi model:

$$Q = k_H t^{0.5} \quad (S3)$$

where  $Q$  is the percentage of the released drug,  $k_H$  is the Higuchi rate constant and  $t$  is time [1].

**Table S1.** Results from curve fitting the release curves to different models illustrating the value of each model parameters and the  $R^2$  values. The model with the highest  $R^2$  is highlighted.

| Model            | Formulation | Parameters     |                    | $R^2$         |
|------------------|-------------|----------------|--------------------|---------------|
| First order      | s2.5        | $K = 0.0016$   |                    | 0.9603        |
|                  | s7.5        | $K = 0.0041$   |                    | 0.9816        |
|                  | p2.5        | $K = 0.0005$   |                    | 0.9084        |
|                  | p7.5        | $K = 0.0009$   |                    | 0.9484        |
| Korsmeyer-Peppas | s2.5        | $n = 0.4235$   | $k_{K-P} = 6.2302$ | <b>0.9857</b> |
|                  | s7.5        | $n = 0.5219$   | $k_{K-P} = 5.3815$ | <b>0.9758</b> |
|                  | p2.5        | $n = 0.3856$   | $k_{K-P} = 3.6568$ | <b>0.9921</b> |
|                  | p7.5        | $n = 0.3820$   | $k_{K-P} = 5.2808$ | <b>0.9876</b> |
| Higuchi model    | s2.5        | $k_H = 2.2190$ |                    | 0.9357        |
|                  | s7.5        | $k_H = 2.6932$ |                    | 0.8744        |
|                  | p2.5        | $k_H = 1.4972$ |                    | 0.9766        |
|                  | p7.5        | $k_H = 1.9800$ |                    | 0.9753        |

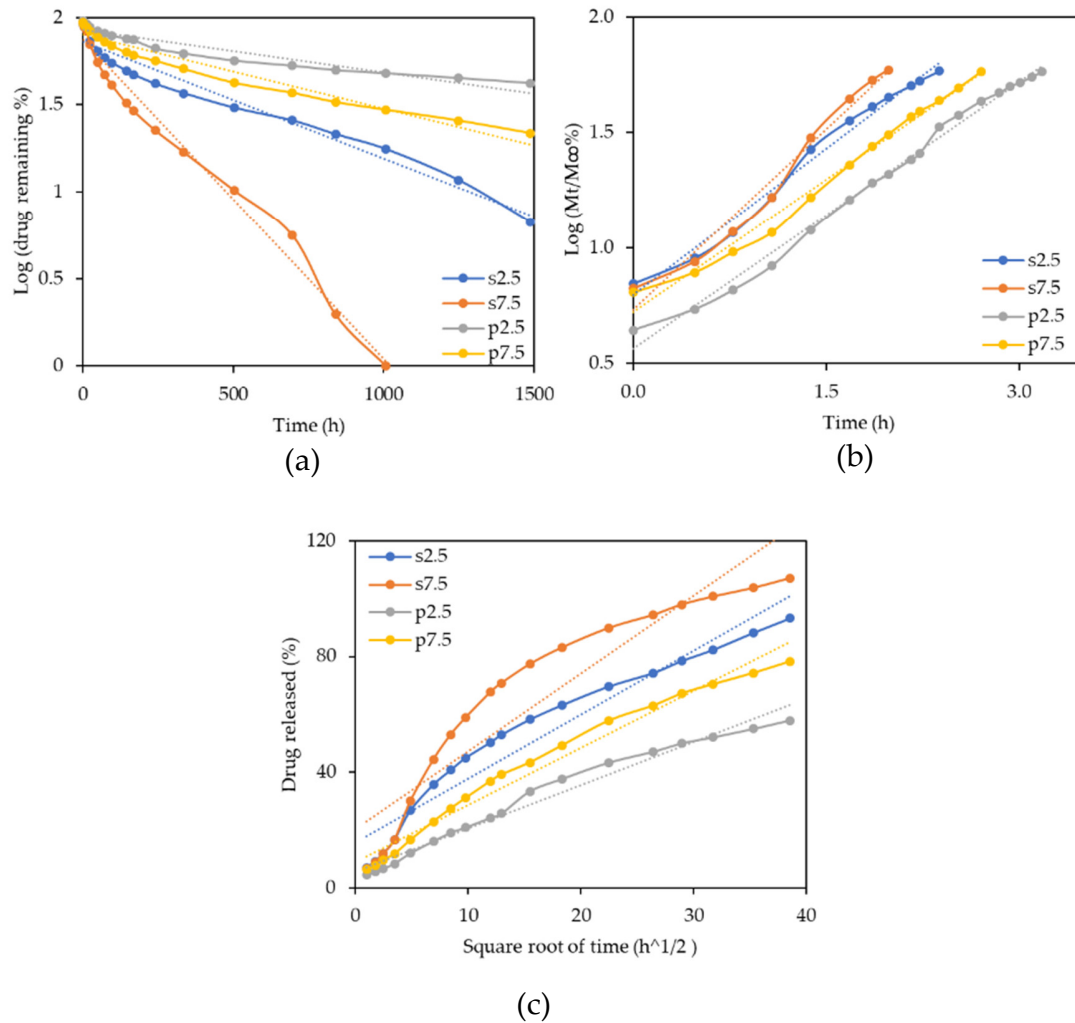

**Figure S2.** Release kinetics of GS from PCL samples according to (a) first order fitting, (b) fitting to Korsmeyer-Peppas model and (c) fitting to Higuchi model. Note: In first order modeling of s7.5 samples data points were limited to 1008 hours as the drug release reached 100%.

## References

1. S., K.; Rama Pawar, R.; D. Kevadiya, B.; C. Bajaj, H. Synthesis of Saponite Based Nanocomposites to Improve the Controlled Oral Drug Release of Model Drug Quinine Hydrochloride Dihydrate. *Pharmaceuticals* **2019**, *12*, 105, doi:10.3390/ph12030105.
